# Supplementary material for: Two-year neurocognitive responses to first occupational lead exposure
Source: PubMed Central journal article supplement (PMC8126443; doi:10.5271/sjweh.3940), 2021-03-31
Supplement: SJWEH-47-233-S002.pdf [file SJWEH-47-233-S002.pdf]

## Two-year neurocognitive responses to first occupational lead exposure<sup>1</sup>

by Yu-Ling Yu, MD, Lutgarde Thijs, MSc, Nelly Saenen, PhD, Jesus D Melgarejo, MD, Dong-Mei Wei, MD, Wen-Yi Yang, MD, PhD, Cai-Guo Yu, MD, Harry A Roels, PhD, Tim S Nawrot, PhD, Gladys E Maestre, MD, PhD, Jan A Staessen, MD, PhD,<sup>2</sup> Zhen-Yu Zhang, MD, PhD

1. *Supplementary material*

2. *Correspondence: to Jan A. Staessen, Research Institute Alliance for the Promotion of Preventive Medicine, Leopoldstraat 59, BE-2800 Mechelen, Belgium. [E-mail: jan.staessen@appremed.org or jan.staessen@med.kuleuven.be]*

| <b>Table of contents</b>                                                                                                                                                                                             | <b>Page</b> |
|----------------------------------------------------------------------------------------------------------------------------------------------------------------------------------------------------------------------|-------------|
| <b>Cumulative blood lead index</b>                                                                                                                                                                                   | 2           |
| <b>Table S1.</b> Baseline and follow-up characteristics of workers in the DST cohort                                                                                                                                 | 3           |
| <b>Table S2.</b> Baseline and follow-up characteristics of workers in the ST cohort                                                                                                                                  | 5           |
| <b>Table S3.</b> Baseline characteristics of workers analyzed and not analyzed                                                                                                                                       | 6           |
| <b>Table S4.</b> Baseline neurocognitive function by fourths of the distribution of the follow-up-to-baseline blood lead concentration ratio                                                                         | 9           |
| <b>Table S5.</b> Follow-up neurocognitive function by fourths of the distribution of the follow-up-to-baseline blood lead concentration ratio                                                                        | 11          |
| <b>Table S6.</b> Associations between changes from baseline to follow-up in neurocognitive function and blood lead stratified by the median baseline age                                                             | 13          |
| <b>Table S7.</b> Associations between changes from baseline to follow-up in neurocognitive function and blood lead stratified by the median baseline blood lead concentration                                        | 14          |
| <b>Table S8.</b> Associations between changes from baseline to follow-up in neurocognitive function and blood lead stratified by the median CBLI                                                                     | 15          |
| <b>Table S9.</b> Associations between changes in neurocognitive function and blood lead from baseline to follow-up modelled by linear regression analysis.                                                           | 16          |
| <b>Table S10.</b> Association of neurocognitive function with blood lead at baseline and last follow-up analysed separately, using linear or logistic regression.                                                    | 17          |
| <b>Table S11.</b> Time-dependent DST and ST results by observer                                                                                                                                                      | 18          |
| <b>Table S11.</b> Geometric mean blood lead levels in the DST and ST cohorts by observer                                                                                                                             | 20          |
| <b>Figure S1.</b> Bland-Altman plot for duplicate blood lead measurements in 30 workers                                                                                                                              | 21          |
| <b>Figure S2.</b> Baseline age distribution in the DST and ST cohorts                                                                                                                                                | 22          |
| <b>Figure S3.</b> Blood lead levels at baseline and at the 1-year and 2-year follow-up visits                                                                                                                        | 23          |
| <b>Figure S4.</b> Distributions of baseline blood lead, follow-up blood lead, and the baseline-to-last-follow-up ratios in blood lead in the DST and ST cohorts                                                      | 24          |
| <b>Figure S5.</b> Associations of the changes from baseline to last follow-up in latency time in the DST cohort and in mean reaction time in ST cohort with the follow-up-to-baseline blood lead concentration ratio | 25          |

### Cumulative blood lead index

The calculation of cumulative blood lead index (CBLI) is based on the blood lead level in early years of life and the repeated measurement before and after exposure, and the time intervals between successive blood lead measurements, which indicates the accumulative level of lead exposure. The formula for CBLI ( $\mu\text{g}/\text{dL} \times \text{year}$ ) is as follows (1).

$$\int_0^T Pb_{B_t} dt = \sum 0.5(Pb_{B_i} + Pb_{B_{i+1}})\Delta t = \text{CBLI}$$

where  $Pb_{B_i}$  and  $Pb_{B_{i+1}}$  are the  $i^{\text{th}}$  and  $(i+1)^{\text{th}}$  blood lead levels, and  $\Delta t$  (in years) is the time interval between successive blood lead values (1). In our study, age for workers leaving school at less than, at, and above the 12th grade were assumed to be 14, 18 and 23 years; based on NHANES data (1988-1994), the corresponding blood lead levels in early years were set at 2.2, 1.4 and 1.5  $\mu\text{g}/\text{dL}$ , respectively (2). Therefore, the CBLI in our study was:

$$\text{CBLI} = 0.5 \times (A_0 - A_e) \times (Pb_0 + Pb_e) + 0.5 \times (A_1 - A_0) \times (Pb_1 + Pb_0) + 0.5 \times (A_2 - A_1) \times (Pb_2 + Pb_1)$$

The symbols, e, 0, 1 and 2 in the equation above, represented the age (A) and blood lead level (Pb) early in life, at baseline, and at the 1-year and 2-year follow-up visits, respectively. If the participant missed one follow-up visit, the last term of the above equation was dropped.

### References

1. Roels H, Konings J, Green S, Bradley D, Chettle D, Lauwerys R. Time-integrated blood lead concentration is a valid surrogate for estimating the cumulative lead dose assessed by tibial lead measurement. *Environ Res.* 1995;69:75-82.
2. Fadowski JJ, Navas-Acien A, Tellez-Plaza M, Guallar E, Weaver VM, Furth SL. Blood lead level and kidney function in US adolescents. The Third National Health and Nutrition Examination Survey. *Arch Intern Med.* 2010;170:75-82.

**Table S1.** Baseline and follow-up characteristics of workers in the DST cohort (starts). Average values are arithmetic [standard deviation (SD)] or geometric means [interquartile range (IR)]. [CI=confidence interval; HDL=high density lipoprotein; DST=digit-symbol test].

| Characteristic (N=260)                   | Baseline   |              | Last follow-up |              | $\Delta$ (95% CI) <sup>a</sup> |              | P value |
|------------------------------------------|------------|--------------|----------------|--------------|--------------------------------|--------------|---------|
|                                          | N (%)      | Mean (SD/IR) | N (%)          | Mean (SD/IR) | Mean                           | 95% CI       |         |
| Education                                |            |              |                |              |                                |              |         |
| Less than high school                    | 9 (3.46)   |              | 9 (3.46)       |              |                                |              |         |
| High school or equivalent                | 205 (78.8) |              | 205 (78.8)     |              |                                |              |         |
| College or university                    | 46 (17.7)  |              | 46 (17.7)      |              |                                |              |         |
| Alcohol intake <sup>b</sup>              |            |              |                |              |                                |              |         |
| Non-drinkers                             | 147 (56.5) |              | 110 (42.3)     |              | -14.2                          | -20.4, -7.87 |         |
| Light                                    | 74 (28.5)  |              | 84 (32.3)      |              | 3.85                           | -3.10, 10.7  | 0.0047  |
| Moderate                                 | 25 (9.62)  |              | 44 (16.9)      |              | 7.31                           | 2.31, 12.2   |         |
| Heavy                                    | 14 (5.38)  |              | 22 (8.46)      |              | 3.08                           | -1.03, 7.13  |         |
| Current smokers                          | 69 (26.5)  |              | 72 (27.7)      |              | 1.15                           | -2.90, 5.17  | 0.58    |
| Hypertension $\geq$ stage 1 <sup>c</sup> | 128 (49.2) |              | 165 (63.5)     |              | 14.2                           | 6.65, 21.6   | 0.0002  |
| Hypertension $\geq$ stage 2 <sup>c</sup> | 45 (17.3)  |              | 45 (17.3)      |              | --                             | --           | --      |
| Treated hypertension                     | 14 (5.38)  |              | 25 (9.62)      |              | 4.23                           | 1.55, 6.85   | 0.0019  |
| Diabetes mellitus <sup>d</sup>           | 10 (3.85)  |              | 16 (6.15)      |              | 2.31                           | 0.19, 4.39   | 0.032   |

**Table S1.** Baseline and follow-up characteristics of workers in the DST cohort (continued from page 3). Average values are arithmetic [standard deviation (SD)] or geometric means [interquartile range (IR)]. [CI=confidence interval; HDL=high density lipoprotein; DST=digit-symbol test].

| Characteristic (N=260)                            | Baseline |                  | Last follow-up |                  | Δ (95% CI) <sup>a</sup> |             | P value |
|---------------------------------------------------|----------|------------------|----------------|------------------|-------------------------|-------------|---------|
|                                                   | N (%)    | Mean (SD/IR)     | N (%)          | Mean (SD/IR)     | Mean                    | CI          |         |
| Age, years                                        |          | 29.4 (9.68)      |                | 31.2 (9.75)      | 1.82                    | 1.76, 1.87  | <0.0001 |
| Systolic pressure (mm Hg) <sup>c</sup>            |          | 120.1 (10.5)     |                | 123.0 (9.67)     | 2.97                    | 1.66, 4.29  | <0.0001 |
| Diastolic pressure (mm Hg) <sup>c</sup>           |          | 79.6 (8.93)      |                | 80.8 (7.44)      | 1.22                    | 0.09, 2.36  | 0.035   |
| Heart rate (beats/minute) <sup>c</sup>            |          | 74.3 (11.8)      |                | 79.0 (11.1)      | 4.73                    | 3.05, 6.42  | <0.0001 |
| Body mass index (kg/m <sup>2</sup> ) <sup>e</sup> |          | 28.8 (6.04)      |                | 29.4 (6.10)      | 0.62                    | 0.36, 0.89  | <0.0001 |
| Serum creatinine (mg/dL) <sup>f</sup>             |          | 0.93 (0.23)      |                | 1.01 (0.18)      | 0.08                    | 0.06, 0.10  | <0.0001 |
| Total serum cholesterol (mg/dL) <sup>f</sup>      |          | 171.8 (38.4)     |                | 174.5 (37.3)     | 2.59                    | -0.33, 5.50 | 0.082   |
| HDL serum cholesterol (mg/dL) <sup>f</sup>        |          | 46.8 (12.4)      |                | 46.2 (11.7)      | -0.55                   | -1.61, 0.51 | 0.31    |
| Total-to-HDL cholesterol ratio                    |          | 3.90 (1.30)      |                | 4.02 (1.40)      | 0.12                    | 0.01, 0.22  | 0.033   |
| Blood glucose (mmol/L) <sup>f</sup>               |          | 93.8 (15.6)      |                | 91.3 (34.9)      | -2.24                   | -6.79, 2.31 | 0.33    |
| Blood lead (μg/dL, log) <sup>f</sup>              |          | 3.97 (2.30-7.70) |                | 13.1 (9.45-22.1) | 230                     | 195, 270    | <0.0001 |

<sup>a</sup> Changes from baseline to last follow-up are given with 95% confidence interval. For proportions, categorical variables and logarithmically transformed variables, percentage changes are given.

<sup>b</sup> Participants were categorized as non-drinker versus light, moderate or heavy drinkers. Among women, light, moderate and heavy drinkers reported a daily alcohol intake of ≤6, >6-14 and >14 gram; for men, these quantities were ≤12, >12-28, and >28 gram, respectively.

<sup>c</sup> Blood pressure was the average of five consecutive readings obtained with the auscultatory technique after the workers had rested for 5 minutes in the seated position. Hypertension was categorized according to the 2017 ACC/AHA guideline, irrespective of treatment status. If systolic and diastolic blood pressures were in different categories, the highest level was used to classify participants. Stage-1 hypertension was a blood pressure of 130-139 mm Hg systolic and 80-89 mm Hg diastolic. Higher levels were classified as stage 2. Heart rate was counted over 15 s.

<sup>d</sup> Diabetes mellitus was a self-reported diagnosis, a fasting blood glucose of 126 mg/dL (7 mmol/L) or higher, or use of antidiabetic drugs.

<sup>e</sup> Body mass index is weight in kilograms divided by height in meter squared.

<sup>f</sup> To convert serum creatinine to μmol/L, multiply by 88.42; to convert cholesterol to mmol/L, multiply by 38.67; to convert glucose to mg/dL, multiply by 17.9; to convert lead from μg/dL to μmol/L multiply by 20.

**Table S2.** Baseline and follow-up characteristics of workers in the ST cohort (starts). Average values are arithmetic [standard deviation (SD)] or geometric means [interquartile range (IR)]. [CI=confidence interval; HDL=high density lipoprotein; ST=Stroop test].

| Characteristic (N=168)                   | Baseline   |              | Last follow-up |              | $\Delta$ (95% CI) <sup>a</sup> |              | P value |
|------------------------------------------|------------|--------------|----------------|--------------|--------------------------------|--------------|---------|
|                                          | N (%)      | Mean (SD/IR) | N (%)          | Mean (SD/IR) | Mean                           | CI           |         |
| Education                                |            |              |                |              |                                |              |         |
| Less than high school                    | 7 (4.17)   |              | 7 (4.17)       |              |                                |              |         |
| High school or equivalent                | 130 (77.4) |              | 130 (77.4)     |              |                                |              |         |
| College or university                    | 31 (18.5)  |              | 31 (18.5)      |              |                                |              |         |
| Alcohol intake <sup>b</sup>              |            |              |                |              |                                |              |         |
| Non-drinkers                             | 95 (56.5)  |              | 72 (42.9)      |              | -13.7                          | -21.7, -5.39 |         |
| Light                                    | 49 (29.2)  |              | 61 (36.3)      |              | 7.14                           | -1.30, 15.5  | 0.067   |
| Moderate                                 | 14 (8.33)  |              | 24 (14.3)      |              | 5.95                           | -0.15, 11.9  |         |
| Heavy                                    | 10 (5.95)  |              | 11 (6.55)      |              | 0.60                           | -4.16, 5.34  |         |
| Current smokers                          | 47 (28.0)  |              | 52 (31.0)      |              | 2.98                           | -2.60, 8.45  | 0.30    |
| Hypertension $\geq$ stage 1 <sup>c</sup> | 80 (47.6)  |              | 118 (70.2)     |              | 22.6                           | 13.9, 30.8   | <0.0001 |
| Hypertension $\geq$ stage 2 <sup>c</sup> | 30 (17.9)  |              | 36 (21.4)      |              | 3.57                           | -2.30, 9.38  | 0.24    |
| Treated hypertension                     | 10 (5.95)  |              | 14 (8.33)      |              | 2.38                           | -0.45, 5.15  | 0.10    |
| Diabetes mellitus <sup>d</sup>           | 6 (3.57)   |              | 7 (4.17)       |              | 0.60                           | -1.40, 2.58  | 0.56    |

**Table S2.** Baseline and follow-up characteristics of workers in the ST cohort (continued from page 5). Average values are arithmetic [standard deviation (SD)] or geometric means [interquartile range (IR)]. [CI=confidence interval; HDL=high density lipoprotein; ST=Stroop test].

| Characteristic (N=168)                            | Baseline |                  | Last follow-up |                  | Δ (95% CI) <sup>a</sup> |              | P value |
|---------------------------------------------------|----------|------------------|----------------|------------------|-------------------------|--------------|---------|
|                                                   | N (%)    | Mean (SD/IR)     | N (%)          | Mean (SD/IR)     | Mean                    | 95% CI       |         |
| Age, years                                        |          | 29.7 (9.68)      |                | 30.8 (9.96)      | 1.10                    | 0.72, 1.49   | <0.0001 |
| Systolic pressure (mm Hg) <sup>c</sup>            |          | 119.4 (10.3)     |                | 123.4 (9.30)     | 4.01                    | 2.50, 5.53   | <0.0001 |
| Diastolic pressure (mm Hg) <sup>c</sup>           |          | 79.6 (9.10)      |                | 82.9 (7.27)      | 3.27                    | 1.85, 4.69   | <0.0001 |
| Heart rate (beats/minute) <sup>c</sup>            |          | 74.8 (12.3)      |                | 80.0 (12.0)      | 5.17                    | 3.25, 7.09   | <0.0001 |
| Body mass index (kg/m <sup>2</sup> ) <sup>e</sup> |          | 28.6 (5.59)      |                | 28.9 (5.55)      | 0.25                    | 0.03, 0.46   | 0.026   |
| Serum creatinine (mg/dL) <sup>f</sup>             |          | 0.94 (0.17)      |                | 1.00 (0.17)      | 0.06                    | 0.04, 0.08   | <0.0001 |
| Total serum cholesterol (mg/dL) <sup>f</sup>      |          | 173.7 (34.0)     |                | 172.0 (35.9)     | -1.68                   | -5.14, 1.78  | 0.34    |
| HDL serum cholesterol (mg/dL) <sup>f</sup>        |          | 46.5 (12.0)      |                | 45.3 (11.7)      | -1.25                   | -2.53, 0.02  | 0.055   |
| Total-to-HDL cholesterol ratio                    |          | 3.94 (1.14)      |                | 4.03 (1.31)      | 0.10                    | -0.03, 0.22  | 0.12    |
| Blood glucose (mmol/L) <sup>f</sup>               |          | 93.8 (16.3)      |                | 87.3 (31.9)      | -6.48                   | -11.8, -1.16 | 0.017   |
| Blood lead (μg/dL, log) <sup>f</sup>              |          | 4.13 (2.30-7.80) |                | 14.2 (10.9-21.3) | 244                     | 203, 291     | <0.0001 |

<sup>a</sup> Changes from baseline to last follow-up are given with 95% confidence interval. For proportions, categorical variables and logarithmically transformed variables, percentage changes are given.

<sup>b</sup> Participants were categorized as non-drinker versus light, moderate or heavy drinkers. Among women, light, moderate and heavy drinkers reported a daily alcohol intake of ≤6, >6-14 and >14 gram; for men, these quantities were ≤12, >12-28, and >28 gram, respectively.

<sup>c</sup> Blood pressure was the average of five consecutive readings obtained with the auscultatory technique after the workers had rested for 5 minutes in the seated position. Hypertension was categorized according to the 2017 ACC/AHA guideline, irrespective of treatment status. If systolic and diastolic blood pressures were in different categories, the highest level was used to classify participants. Stage 1 hypertension was a blood pressure of 130-139 mm Hg systolic and 80-89 mm Hg diastolic. Higher levels were classified as stage 2. Heart rate was counted over 15 s.

<sup>d</sup> Diabetes mellitus was a self-reported diagnosis, a fasting blood glucose of 126 mg/dL (7 mmol/L) or higher, or use of antidiabetic drugs.

<sup>e</sup> Body mass index is weight in kilograms divided by height in meter squared.

<sup>f</sup> To convert serum creatinine to μmol/L, multiply by 88.42; to convert cholesterol to mmol/L, multiply by 38.67; to convert glucose to mg/dL, multiply by 17.9; to convert lead from μg/dL to μmol/L multiply by 20.

**Table S3.** Baseline characteristics of workers analyzed and not analyzed (starts). Average values are arithmetic [standard deviation (SD)] or geometric means [interquartile range (IR)]. [CI=confidence interval; HDL=high density lipoprotein].

| Characteristic                      | Analyzed (N=267) |              | Not analyzed (N=239) |              | P value |
|-------------------------------------|------------------|--------------|----------------------|--------------|---------|
|                                     | N (%)            | Mean (SD/IR) | N (%)                | Mean (SD/IR) |         |
| Education                           |                  |              |                      |              |         |
| Less than high school               | 9 (3.4)          |              | 6 (2.5)              |              | 0.61    |
| High school or equal                | 211 (79.0)       |              | 190 (79.5)           |              |         |
| College or university               | 47 (17.6)        |              | 43 (18.0)            |              |         |
| Alcohol consumption <sup>a</sup>    |                  |              |                      |              |         |
| Non-drinkers                        | 150 (56.2)       |              | 146 (61.1)           |              | 0.72    |
| Light                               | 77 (28.8)        |              | 63 (26.4)            |              |         |
| Moderate                            | 25 (9.36)        |              | 19 (7.95)            |              |         |
| Heavy                               | 15 (5.62)        |              | 11 (4.60)            |              |         |
| Current smokers                     | 71 (26.6)        |              | 73 (30.5)            |              | 0.33    |
| Hypertension > stage 1 <sup>b</sup> | 132 (49.4)       |              | 155 (64.9)           |              | 0.0005  |
| Hypertension ≥ stage 2 <sup>b</sup> | 47 (17.6)        |              | 40 (16.7)            |              | 0.80    |
| Treated hypertension <sup>b</sup>   | 14 (5.24)        |              | 11 (4.60)            |              | 0.74    |
| Diabetes mellitus <sup>c</sup>      | 10 (3.75)        |              | 6 (2.51)             |              | 0.43    |

**Table S3.** Baseline characteristics of workers analyzed and not analyzed (continued from page 7). Average values are arithmetic [standard deviation (SD)] or geometric means [interquartile range (IR)]. [CI=confidence interval; HDL=high density lipoprotein].

| Characteristic                                    | Analyzed (N=267) |                  | Not analyzed (N=239) |                  | P value |
|---------------------------------------------------|------------------|------------------|----------------------|------------------|---------|
|                                                   | N (%)            | Mean (SD/IR)     | N (%)                | Mean (SD/IR)     |         |
| Age, years                                        |                  | 29.5 (9.78)      |                      | 27.9 (10.1)      | 0.085   |
| Systolic pressure (mm Hg) <sup>b</sup>            |                  | 120.1 (10.5)     |                      | 120.2 (10.2)     | 0.90    |
| Diastolic pressure (mm Hg) <sup>b</sup>           |                  | 79.6 (8.90)      |                      | 81.2 (8.24)      | 0.037   |
| Heart rate (beats/minute) <sup>b</sup>            |                  | 74.3 (11.9)      |                      | 74.9 (12.5)      | 0.59    |
| Body mass index (kg/m <sup>2</sup> ) <sup>d</sup> |                  | 28.7 (6.02)      |                      | 29.2 (6.84)      | 0.37    |
| Serum creatinine (md/dL) <sup>e</sup>             |                  | 0.93 (0.23)      |                      | 0.95 (0.17)      | 0.83    |
| Total serum cholesterol (mg/dL) <sup>e</sup>      |                  | 172.0 (38.1)     |                      | 171.5 (38.4)     | 0.95    |
| HDL serum cholesterol (mg/dL) <sup>e</sup>        |                  | 46.9 (12.3)      |                      | 47.4 (12.0)      | 0.58    |
| Total-to-HDL cholesterol ratio                    |                  | 3.89 (1.29)      |                      | 3.85 (1.35)      | 0.80    |
| Blood glucose (mg/dL) <sup>e</sup>                |                  | 93.8 (15.4)      |                      | 93.2 (11.9)      | 0.33    |
| Blood lead (µg/dL, log) <sup>e</sup>              |                  | 4.04 (2.30-7.80) |                      | 4.14 (2.30-7.80) | 0.74    |

<sup>a</sup> Participants were categorized as non-drinker versus light, moderate and heavy drinkers. Among women, light, moderate and heavy drinkers reported a daily alcohol intake of ≤6, >6-14 and >14 gram; for men, these quantities were ≤12, >12-28, and >28 gram, respectively.

<sup>b</sup> Blood pressure was the average of five consecutive readings obtained with the auscultatory technique after the workers had rested for 5 minutes in the seated position. Hypertension was categorized according to the 2017 ACC/AHA guideline, irrespective of treatment status. If systolic and diastolic blood pressures were in different categories, the highest level was used to classify participants. Stage 1 hypertension was a blood pressure of 130-139 mm Hg systolic and 80-89 mm Hg diastolic. Higher levels were classified as stage 2. Heart rate was counted over 15 s.

<sup>c</sup> Diabetes mellitus was a self-reported diagnosis, a fasting blood glucose of 126 mg/dL (7 mmol/L) or higher, or use of antidiabetic drugs.

<sup>d</sup> Body mass index is weight in kilograms divided by height in meter squared.

<sup>e</sup> To convert serum creatinine to µmol/L, multiply by 88.42; to convert cholesterol to mmol/L, multiply by 38.67; to convert glucose to mg/dL, multiply by 17.9; to convert lead from µg/dL to µmol/L multiply by 20.



**Table S4.** Baseline neurocognitive function by fourths of the distribution of the follow-up-to-baseline blood lead concentration ratio (starts). Average values are geometric means [interquartile range (IR)]. [MRT=mean reaction time; DST=digit-symbol test; ST=Stroop test].

| Characteristic                      | Low fourth |            | Low-middle fourth |            | High-middle fourth |            | High fourth |            | P for linear trend <sup>a</sup> |
|-------------------------------------|------------|------------|-------------------|------------|--------------------|------------|-------------|------------|---------------------------------|
|                                     | N/Mean     | %/IR       | N/Mean            | %/IR       | N/Mean             | %/IR       | N/Mean      | %/IR       |                                 |
| DST cohort (N=260)                  |            |            |                   |            |                    |            |             |            |                                 |
| Quartile limits                     | <1.90      |            | 1.90-3.37         |            | 3.37-5.75          |            | ≥5.75       |            |                                 |
| Mean latency time (s, log)          | 112.8      | 97.5-130.5 | 109.8             | 96.0-120.8 | 105.9              | 97.6-116.1 | 107.2       | 92.8-119.1 | 0.076                           |
| Number of errors                    |            |            |                   |            |                    |            |             |            |                                 |
| 0                                   | 33         | 50.8       | 37                | 56.9       | 43                 | 66.2       | 40          | 61.5       |                                 |
| 1                                   | 21         | 32.3       | 17                | 26.2       | 18                 | 27.7       | 17          | 26.2       | 0.10                            |
| >1                                  | 11         | 16.9       | 11                | 16.9       | 4                  | 6.2        | 8           | 12.3       |                                 |
| ST cohort (N=168)                   |            |            |                   |            |                    |            |             |            |                                 |
| Quartile limits                     | <1.98      |            | 1.98-3.26         |            | 3.26-5.52          |            | ≥5.52       |            |                                 |
| MRT in incongruent trials (ms, log) |            |            |                   |            |                    |            |             |            |                                 |
| All responses                       | 1636       | 1321-1965  | 1552              | 1238-1841  | 1574               | 1348-1837  | 1664        | 1356-2006  | 0.75                            |
| Correct responses <sup>a</sup>      | 1638       | 1321-1965  | 1559              | 1238-1876  | 1572               | 1373-1837  | 1666        | 1356-2047  | 0.78                            |
| MRT congruent trials (ms, log)      |            |            |                   |            |                    |            |             |            |                                 |
| All responses                       | 1495       | 1187-1815  | 1390              | 1163-1492  | 1565               | 1195-1920  | 1496        | 1179-1680  | 0.61                            |
| Correct responses <sup>a</sup>      | 1495       | 1187-1815  | 1390              | 1163-1492  | 1565               | 1195-1920  | 1496        | 1179-1680  | 0.61                            |

**Table S4.** Baseline neurocognitive function by fourths of the follow-up-to-baseline blood lead concentration ratio (continued from page 9). Average values are geometric means [interquartile range (IR)]. [MRT=mean reaction time; DST=digit-symbol test; ST=Stroop test].

| Characteristic                          | Low fourth |           | Low-middle fourth |           | High-middle fourth |           | High quartile |           | P for linear trend <sup>a</sup> |
|-----------------------------------------|------------|-----------|-------------------|-----------|--------------------|-----------|---------------|-----------|---------------------------------|
|                                         | N/Mean     | %/IR      | N/Mean            | %/IR      | N/Mean             | %/IR      | N/Mean        | %/IR      |                                 |
| Correct ratio in incongruent trials (%) |            |           |                   |           |                    |           |               |           |                                 |
| 100                                     | 37         | 88.1      | 37                | 88.1      | 34                 | 81.0      | 37            | 88.1      | 0.40                            |
| 90-99                                   | 3          | 7.1       | 2                 | 4.8       | 4                  | 9.5       | 3             | 7.1       |                                 |
| <90                                     | 2          | 4.8       | 3                 | 7.1       | 4                  | 9.5       | 2             | 4.8       |                                 |
| Correct ratio in congruent trials (%)   |            |           |                   |           |                    |           |               |           |                                 |
| 100                                     | 42         | 100       | 42                | 100       | 42                 | 100       | 42            | 100       | 1.00                            |
| <100                                    | 0          | 0         | 0                 | 0         | 0                  | 0         | 0             | 0         |                                 |
| Interference effect (ms, log)           |            |           |                   |           |                    |           |               |           |                                 |
| All responses                           | 1.09       | 0.96-1.21 | 1.12              | 0.97-1.27 | 1.01               | 0.94-1.15 | 1.11          | 0.99-1.29 | 0.77                            |
| Correct responses <sup>b</sup>          | 1.10       | 0.97-1.22 | 1.12              | 0.98-1.27 | 1.00               | 0.94-1.15 | 1.12          | 0.99-1.19 |                                 |
| Interference score                      |            |           |                   |           |                    |           |               |           |                                 |
| >0                                      | 0          | 0.0       | 0                 | 0.0       | 0                  | 0.0       | 0             | 0.0       | 0.76                            |
| 0                                       | 37         | 88.1      | 37                | 88.1      | 34                 | 81.0      | 37            | 88.1      |                                 |
| >0                                      | 5          | 11.9      | 5                 | 11.9      | 8                  | 19.0      | 5             | 11.9      |                                 |

<sup>a</sup> There was no bias in the initial values of the neurocognitive tests across increasing categories of the follow-up-to-baseline blood lead concentration ratio.

<sup>b</sup> One participant did not provide any correct response at baseline and follow-up and was not included in the MRT of correct responses.

**Table S5** Follow-up neurocognitive function by fourths of the distribution of the follow-up-to-baseline blood lead concentration ratio (starts). Average values are geometric means [interquartile range (IR)]. [MRT=mean reaction time; DST=digit-symbol test; ST=Stroop test].

| Characteristic                      | Low fourth |            | Low-middle fourth |            | High-middle fourth |            | High fourth |            | P for linear trend |
|-------------------------------------|------------|------------|-------------------|------------|--------------------|------------|-------------|------------|--------------------|
|                                     | N/Mean     | %/IR       | N/Mean            | %/IR       | N/Mean             | %/IR       | N/Mean      | %/IR       |                    |
| DST cohort (N=260)                  |            |            |                   |            |                    |            |             |            |                    |
| Quartile limits                     | <1.90      |            | 1.90-3.37         |            | 3.37-5.75          |            | ≥5.75       |            |                    |
| Mean latency time (s, log)          | 104.8      | 90.8-117.9 | 111.6             | 95.5-127.7 | 105.6              | 88.7-121.2 | 108.6       | 91.3-126.8 | 0.65               |
| Number of errors                    |            |            |                   |            |                    |            |             |            |                    |
| 0                                   | 38         | 58.5       | 40                | 61.5       | 39                 | 60.0       | 43          | 66.2       |                    |
| 1                                   | 19         | 29.2       | 18                | 27.7       | 16                 | 24.6       | 18          | 27.7       | 0.38               |
| >1                                  | 8          | 12.3       | 7                 | 10.8       | 10                 | 15.4       | 4           | 6.2        |                    |
| ST cohort (N=168)                   |            |            |                   |            |                    |            |             |            |                    |
| Quartile limits                     | <1.98      |            | 1.98-3.26         |            | 3.26-5.52          |            | ≥5.52       |            |                    |
| MRT in incongruent trials (ms, log) |            |            |                   |            |                    |            |             |            |                    |
| All responses                       | 2287       | 1910-2901  | 2094              | 1664-2575  | 2105               | 1667-2630  | 1886        | 1558-2227  | 0.016              |
| Correct responses <sup>a</sup>      | 2260       | 1910-2895  | 2110              | 1733-2575  | 2127               | 1667-2630  | 1832        | 1517-2146  | 0.0093             |
| MRT congruent trials (ms, log)      |            |            |                   |            |                    |            |             |            |                    |
| All responses                       | 2237       | 1854-2763  | 1883              | 1501-2535  | 1935               | 1539-2248  | 1882        | 1539-2099  | 0.050              |
| Correct responses <sup>a</sup>      | 2237       | 1854-2763  | 1903              | 1501-2604  | 1935               | 1539-2248  | 1904        | 1603-2099  | 0.061              |

**Table S5** Follow-up neurocognitive function by fourths of the distribution of the blood lead changes (continued from page 11). Average values are geometric means [interquartile range (IR)]. [MRT=mean reaction time; DST=digit-symbol test; ST=Stroop test].

| Characteristic                          | Low fourth |           | Low-middle fourth |           | High-middle fourth |           | High fourth |           | P for linear trend <sup>a</sup> |
|-----------------------------------------|------------|-----------|-------------------|-----------|--------------------|-----------|-------------|-----------|---------------------------------|
|                                         | N/Mean     | %/IR      | N/Mean            | %/IR      | N/Mean             | %/IR      | N/Mean      | %/IR      |                                 |
| Correct ratio in incongruent trials (%) |            |           |                   |           |                    |           |             |           |                                 |
| 100                                     | 34         | 81.0      | 33                | 78.6      | 34                 | 81.0      | 37          | 88.1      | 0.10                            |
| 90-99                                   | 6          | 14.3      | 5                 | 11.9      | 4                  | 9.5       | 2           | 4.8       |                                 |
| <90                                     | 2          | 4.8       | 4                 | 9.5       | 4                  | 9.5       | 3           | 7.1       |                                 |
| Correct ratio in congruent trials (%)   |            |           |                   |           |                    |           |             |           |                                 |
| 100                                     | 42         | 100       | 40                | 95.2      | 42                 | 100       | 40          | 95.2      | 0.44                            |
| <100                                    | 0          | 0         | 2                 | 4.8       | 0                  | 0         | 2           | 4.8       |                                 |
| Interference effect (ms, log)           |            |           |                   |           |                    |           |             |           |                                 |
| All responses                           | 1.02       | 0.88-1.17 | 1.11              | 0.93-1.22 | 1.09               | 0.93-1.27 | 1.00        | 0.85-1.23 | 0.63                            |
| Correct responses <sup>b</sup>          | 1.02       | 0.89-1.13 | 1.10              | 0.90-1.19 | 1.10               | 0.93-1.34 | 0.98        | 0.84-1.15 | 0.52                            |
| Interference score                      |            |           |                   |           |                    |           |             |           |                                 |
| >0                                      | 0          | 0.0       | 2                 | 4.8       | 0                  | 0.0       | 1           | 2.4       | 0.40                            |
| 0                                       | 34         | 81.0      | 32                | 76.2      | 34                 | 81.0      | 36          | 85.7      |                                 |
| >0                                      | 8          | 19.0      | 8                 | 19.0      | 8                  | 19.0      | 5           | 11.9      |                                 |

<sup>a</sup> There was no gradient at follow-up in the neurocognitive tests results across increasing categories of the follow-up-to-baseline blood lead concentration ratio.

<sup>b</sup> One participant did not provide any correct response at baseline and follow-up and was not included in the MRT of correct responses.

**Table S6.** Associations between changes ( $\Delta$ ) from baseline to follow-up in neurocognitive function and blood lead stratified by the median baseline age. [OR=odds ratio; CI=95% confidence interval; DST=digit-symbol test; ST=Stroop test; MRT=mean reaction time].

| Characteristic                        | Stratified by the median baseline age |                     |             |         |       |                     |              |         | P for interaction |  |
|---------------------------------------|---------------------------------------|---------------------|-------------|---------|-------|---------------------|--------------|---------|-------------------|--|
|                                       | %a                                    | ORa                 | CI          | P value | %a    | ORa                 | CI           | P value |                   |  |
| DST cohort (N=260)                    |                                       |                     |             |         |       |                     |              |         |                   |  |
| Age                                   |                                       | <26.4 years (N=130) |             |         |       | ≥26.4 years (N=130) |              |         |                   |  |
| Δ latency time (%)                    | 0.33                                  |                     | -1.04, 1.71 | 0.64    | 0.58  |                     | -0.65, 1.82  | 0.35    | 0.20              |  |
| Increasing error rate (0,1)           |                                       | 1.14                | 0.69, 1.89  | 0.60    |       | 1.46                | 0.89, 2.62   | 0.13    | 0.59              |  |
| ST cohort (N=168)                     |                                       |                     |             |         |       |                     |              |         |                   |  |
| Age                                   |                                       | <27.0 years (N=84)  |             |         |       | ≥27.0 years (N=84)  |              |         |                   |  |
| Δ MRT in incongruent trials           |                                       |                     |             |         |       |                     |              |         |                   |  |
| All responses (%)                     | 1.90                                  |                     | -2.29, 6.25 | 0.35    | -2.58 |                     | -5.71, -0.66 | 0.11    | 0.57              |  |
| Correct responses (%)                 | 0.68                                  |                     | -3.24, 4.76 | 0.72    | -2.52 |                     | -5.79, 0.86  | 0.13    | 0.98              |  |
| Δ MRT in congruent trials             |                                       |                     |             |         |       |                     |              |         |                   |  |
| All responses (%)                     | -0.19                                 |                     | -4.72, 4.56 | 0.93    | -1.88 |                     | -5.82, 2.23  | 0.34    | 0.92              |  |
| Correct responses (%)                 | -0.13                                 |                     | -4.71, 4.68 | 0.95    | -1.98 |                     | -5.84, 2.04  | 0.31    | 0.83              |  |
| Increasing error rate                 |                                       |                     |             |         |       |                     |              |         |                   |  |
| Incongruent trials (0,1) <sup>b</sup> |                                       | ...                 | ...         | ...     |       | ...                 | ...          | ...     | ...               |  |
| Congruent trials (0,1) <sup>b</sup>   |                                       | ...                 | ...         | ...     |       | ...                 | ...          | ...     | ...               |  |
| Δ Interference effect                 |                                       |                     |             |         |       |                     |              |         |                   |  |
| All responses (%)                     | 2.33                                  |                     | -1.03, 5.80 | 0.16    | -0.53 |                     | -3.54, 2.56  | 0.72    | 0.42              |  |
| Correct responses (%)                 | 1.91                                  |                     | -1.44, 5.38 | 0.25    | -0.23 |                     | -3.41, 3.06  | 0.88    | 0.56              |  |

<sup>a</sup> For continuous outcomes, estimates express the percentage difference in the follow-up to baseline ratio of DST latency/ST mean reaction time associated with a doubling in the follow-up-to-baseline blood lead concentration ratio. For categorical outcomes, estimates are odds ratios (OR) associating the probability that workers had increasing error rates with a doubling in the follow-up-to-baseline blood lead concentration ratio. Estimates were derived from mixed models, including both the 1-year and 2-year changes in neurocognitive function and blood lead, and accounting for the within-subject correlations using a random participant effect. Adjustments were made for sex, baseline age, the baseline neurocognitive test result, ethnicity (white vs other), change in age, baseline body mass index, change in body weight, educational attainment, baseline blood lead, and the baseline values of and changes during follow-up in smoking status, alcohol consumption (light, moderate and heavy drinkers), and the total-to-HDL serum cholesterol ratio.

<sup>b</sup> An ellipsis indicates that the model did not converge.

**Table S7.** Associations between changes ( $\Delta$ ) from baseline to follow-up in neurocognitive function and blood lead stratified by the median baseline blood lead concentration [OR=odds ratio; CI=95% confidence interval; DST=digit-symbol test; ST=Stroop test; MRT=mean reaction time].

| Characteristic                        | Stratified by the median baseline blood lead |                                |             |         |      |                                      |             |         | P for interaction |
|---------------------------------------|----------------------------------------------|--------------------------------|-------------|---------|------|--------------------------------------|-------------|---------|-------------------|
|                                       | %a                                           | ORa                            | CI          | P value | %a   | ORa                                  | CI          | P value |                   |
| DST cohort (N=260)                    |                                              |                                |             |         |      |                                      |             |         |                   |
| Baseline blood lead                   |                                              | <4.20 $\mu\text{g/dL}$ (N=126) |             |         |      | $\geq$ 4.20 $\mu\text{g/dL}$ (N=134) |             |         |                   |
| $\Delta$ latency time (%)             | -0.09                                        |                                | -1.22, 1.06 | 0.88    | 1.19 |                                      | -0.29, 2.68 | 0.11    | 0.27              |
| Increasing error rate (0,1)           |                                              | 1.00                           | 0.64, 1.58  | 0.99    |      | 1.68                                 | 0.99, 2.86  | 0.056   | 0.34              |
| ST cohort (N=168)                     |                                              |                                |             |         |      |                                      |             |         |                   |
| Baseline blood lead                   |                                              | <4.30 $\mu\text{g/dL}$ (N=81)  |             |         |      | $\geq$ 4.30 $\mu\text{g/dL}$ (N=87)  |             |         |                   |
| $\Delta$ MRT in incongruent trials    |                                              |                                |             |         |      |                                      |             |         |                   |
| All responses (%)                     | -1.90                                        |                                | -5.52, 1.86 | 0.29    | 1.16 |                                      | -3.04, 5.53 | 0.57    | 0.70              |
| Correct responses (%)                 | -2.84                                        |                                | -6.16, 0.60 | 0.096   | 1.34 |                                      | -3.08, 5.96 | 0.54    | 0.45              |
| $\Delta$ MRT in congruent trials      |                                              |                                |             |         |      |                                      |             |         |                   |
| All responses (%)                     | -1.70                                        |                                | -5.66, 2.41 | 0.38    | 0.12 |                                      | -5.20, 5.73 | 0.96    | 0.65              |
| Correct responses (%)                 | -1.66                                        |                                | -5.54, 2.39 | 0.38    | 0.36 |                                      | -5.03, 6.05 | 0.89    | 0.64              |
| Increasing error rate                 |                                              |                                |             |         |      |                                      |             |         |                   |
| Incongruent trials (0,1) <sup>b</sup> |                                              | ...                            | ...         | ...     |      | ...                                  | ...         | ...     | ...               |
| Congruent trials (0,1) <sup>b</sup>   |                                              | ...                            | ...         | ...     |      | ...                                  | ...         | ...     | ...               |
| $\Delta$ Interference effect          |                                              |                                |             |         |      |                                      |             |         |                   |
| All responses (%)                     | 0.18                                         |                                | -2.47, 2.91 | 0.88    | 1.44 |                                      | -2.67, 5.73 | 0.47    | 0.34              |
| Correct responses (%)                 | -0.18                                        |                                | -2.78, 2.49 | 0.89    | 1.55 |                                      | -2.72, 6.01 | 0.46    | 0.22              |

<sup>a</sup> For continuous outcomes, estimates express the percentage difference in the follow-up to baseline ratio of DST latency/ST mean reaction time associated with a doubling in the follow-up-to-baseline blood lead concentration ratio. For categorical outcomes, estimates are odds ratios (OR) associating the probability that workers had increasing error rates with a doubling in the follow-up-to-baseline blood lead concentration ratio. Estimates were derived from mixed models, including both the 1-year and 2-year changes in neurocognitive function and blood lead, and accounting for within-subject correlations using a random participant effect. Adjustments were made for sex, baseline age, the baseline neurocognitive test result, ethnicity (white vs other), change in age, baseline body mass index, changes in body weight, educational attainment, baseline blood lead, and the baseline values of and changes during follow-up in smoking status, alcohol consumption (light, moderate and heavy drinkers), and the total-to-HDL serum cholesterol ratio.

<sup>b</sup> An ellipsis indicates that the model did not converge.

**Table S8.** Associations between changes ( $\Delta$ ) from baseline to follow-up in neurocognitive function and blood lead stratified by the median CBLI [OR=odds ratio; CI=95% confidence interval; DST=digit-symbol test; ST=Stroop test; MRT=mean reaction time; CBLI=cumulative blood lead index].

| Characteristic                        | Stratified by the median of CBLI |                                                   |             |         |       |                                                       |             |         | P for interaction |
|---------------------------------------|----------------------------------|---------------------------------------------------|-------------|---------|-------|-------------------------------------------------------|-------------|---------|-------------------|
|                                       | %a                               | ORa                                               | CI          | P value | %a    | ORa                                                   | CI          | P value |                   |
| DST cohort (N=260)                    |                                  |                                                   |             |         |       |                                                       |             |         |                   |
| CBLI                                  |                                  | <32.5 $\mu\text{g/dL} \times \text{year}$ (N=130) |             |         |       | $\geq 32.5 \mu\text{g/dL} \times \text{year}$ (N=130) |             |         |                   |
| $\Delta$ latency time (%)             | 0.57                             |                                                   | -0.56, 1.72 | 0.32    | -0.06 |                                                       | -1.53, 1.43 | 0.93    | 0.21              |
| Increasing error rate (0,1)           |                                  | 1.10                                              | 0.66, 1.83  | 0.72    |       | 1.23                                                  | 0.75, 2.00  | 0.41    | 0.87              |
| ST cohort (N=168)                     |                                  |                                                   |             |         |       |                                                       |             |         |                   |
| CBLI                                  |                                  | <33.3 $\mu\text{g/dL} \times \text{year}$ (N=84)  |             |         |       | $\geq 33.3 \mu\text{g/dL} \times \text{year}$ (N=84)  |             |         |                   |
| $\Delta$ MRT in incongruent trials    |                                  |                                                   |             |         |       |                                                       |             |         |                   |
| All responses (%)                     | -0.27                            |                                                   | -3.86, 3.46 | 0.88    | -3.12 |                                                       | -6.92, 0.84 | 0.11    | 0.57              |
| Correct responses (%)                 | -1.07                            |                                                   | -4.38, 2.35 | 0.51    | -2.80 |                                                       | -6.70, 1.27 | 0.16    | 0.83              |
| $\Delta$ MRT in congruent trials      |                                  |                                                   |             |         |       |                                                       |             |         |                   |
| All responses (%)                     | -0.38                            |                                                   | -4.50, 3.91 | 0.85    | -3.80 |                                                       | -8.43, 1.06 | 0.11    | 0.69              |
| Correct responses (%)                 | -0.28                            |                                                   | -4.34, 3.96 | 0.89    | -3.75 |                                                       | -8.43, 1.16 | 0.12    | 0.64              |
| Increasing error rate                 |                                  |                                                   |             |         |       |                                                       |             |         |                   |
| Incongruent trials (0,1) <sup>b</sup> |                                  | ...                                               | ...         | ...     |       | ...                                                   | ...         | ...     | ...               |
| Congruent trials (0,1) <sup>b</sup>   |                                  | ...                                               | ...         | ...     |       | ...                                                   | ...         | ...     | ...               |
| $\Delta$ Interference effect          |                                  |                                                   |             |         |       |                                                       |             |         |                   |
| All responses (%)                     | 0.06                             |                                                   | -2.71, 2.91 | 0.96    | 1.22  |                                                       | -2.66, 5.24 | 0.52    | 0.93              |
| Correct responses (%)                 | -0.24                            |                                                   | -2.91, 2.51 | 0.85    | 1.81  |                                                       | -2.20, 5.99 | 0.36    | 0.73              |

<sup>a</sup> For continuous outcomes, estimates express the percentage difference in the follow-up to baseline ratio of DST latency/ST mean reaction time associated with a doubling in the follow-up-to-baseline blood lead ratio. For categorical outcomes, estimates are odds ratios (OR) associating the probability that workers had increasing error rates with a doubling in the follow-up-to-baseline blood lead ratio. Estimates were derived from mixed models, including both the 1-year and 2-year changes in neurocognitive function and blood lead, and accounting for within-subject correlations using a random participant effect. Adjustments were made for sex, baseline age, the baseline neurocognitive test result, ethnicity (white vs other), change in age, baseline body mass index, change in body weight, educational attainment, baseline blood lead, and the baseline values of and changes during follow-up in smoking status, alcohol consumption (light, moderate and heavy drinkers), and the total-to-HDL serum cholesterol ratio.

<sup>b</sup> An ellipsis indicates that the model did not converge.

**Table S9.** Associations between changes in neurocognitive function ( $\Delta$ ) and blood lead from baseline to follow-up modelled by linear regression. [CI=95% confidence interval; DST=digit-symbol test; ST=Stroop test; MRT=mean reaction time].

| Characteristic                     | Unadjusted |              |         | Adjusted <sup>a</sup> |              |         | Fully adjusted <sup>b</sup> |             |         |
|------------------------------------|------------|--------------|---------|-----------------------|--------------|---------|-----------------------------|-------------|---------|
|                                    | % c        | CI           | P value | % c                   | CI           | P value | % c                         | CI          | P value |
| DST cohort                         |            |              |         |                       |              |         |                             |             |         |
| 1-year follow-up (N=244)           |            |              |         |                       |              |         |                             |             |         |
| $\Delta$ latency time (%)          | 0.49       | -0.30, 1.29  | 0.23    | 0.13                  | -0.53, 0.80  | 0.69    | -0.08                       | -1.06, 0.90 | 0.87    |
| 2-year follow-up (N=203)           |            |              |         |                       |              |         |                             |             |         |
| $\Delta$ latency time (%)          | 1.72       | 0.62, 2.84   | 0.0025  | 0.97                  | 0.03, 1.92   | 0.044   | 1.37                        | 0.05, 2.71  | 0.043   |
| ST cohort <sup>d</sup>             |            |              |         |                       |              |         |                             |             |         |
| 1-year follow-up (N=168)           |            |              |         |                       |              |         |                             |             |         |
| $\Delta$ MRT in incongruent trials | -2.15      | -3.95, -0.31 | 0.023   | -1.96                 | -3.48, -0.42 | 0.014   | -1.07                       | -3.47, 1.38 | 0.39    |
| $\Delta$ MRT in congruent trials   | -1.24      | -3.47, 1.03  | 0.28    | -1.19                 | -2.94, 0.58  | 0.19    | -1.93                       | -4.66, 0.88 | 0.18    |
| $\Delta$ Interference effect       | -0.92      | -2.67, 0.87  | 0.31    | -0.72                 | -2.08, 0.67  | 0.31    | 1.31                        | -0.88, 3.55 | 0.24    |

a Adjusted models accounted for sex and baseline age and the baseline neurocognitive test results, i.e., latency/reaction time (continuous outcomes) or the number of errors (ordinal outcomes).

b Fully adjusted models additionally accounted for ethnicity (white vs other), change in age, baseline body mass index, change in body weight, educational attainment, baseline blood lead, and the baseline values of and changes during follow-up in smoking status, the total-to-HDL serum cholesterol ratio, and alcohol intake (light, moderate and heavy).

c All association sizes are expressed for a doubling in the follow-up-to-baseline blood lead concentration ratio. Estimates are the percentage difference in the follow-up minus baseline value for continuous variables and odds ratios for categorical outcomes.

d Only 48 participants had a follow-up visit at the second year.

e An ellipsis indicates that the model did not converge.



**Table S10.** Association of neurocognitive function with blood lead at baseline and last follow-up analysed separately, using linear or logistic regression. [CI=95% confidence interval; MRT=mean reaction time; BL=baseline; FU=last follow-up; *Pslope*=significance of the difference between baseline and follow-up in the slope of the neurocognitive measurement on the blood lead concentration]

| Characteristics                   |                                     | Unadjusted <sup>a</sup> |             |             |               | Adjusted <sup>a</sup> |             |             |               |
|-----------------------------------|-------------------------------------|-------------------------|-------------|-------------|---------------|-----------------------|-------------|-------------|---------------|
|                                   |                                     | $\beta$                 | 95% CI      | P-value     | <i>Pslope</i> | $\beta$               | 95% CI      | P-Value     | <i>Pslope</i> |
| Stroop test                       |                                     |                         |             |             |               |                       |             |             |               |
|                                   | MRT of incongruent trials (ms, log) | BL                      | 1.53        | -4.29, 7.71 | 0.61          | 0.92                  | 1.66        | -4.27, 7.95 | 0.59          |
|                                   | FU                                  | 1.00                    | -7.56, 10.4 | 0.83        | 4.97          |                       | -4.30, 15.1 | 0.31        |               |
| MRT of congruent trials (ms, log) |                                     |                         |             |             |               |                       |             |             |               |
|                                   |                                     | BL                      | 0.80        | -5.79, 7.84 | 0.82          | 0.67                  | 0.71        | -6.02, 7.92 | 0.84          |
|                                   | FU                                  | -1.70                   | -10.5, 7.92 | 0.72        | 1.67          |                       | -8.16, 12.6 | 0.75        |               |
| Interference effect               |                                     |                         |             |             |               |                       |             |             |               |
|                                   |                                     | BL                      | 0.73        | -3.64, 5.30 | 0.75          | 0.61                  | 0.94        | -3.53, 5.62 | 0.69          |
|                                   | FU                                  | 2.75                    | -3.50, 9.40 | 0.40        | 3.25          |                       | -3.58, 10.6 | 0.36        |               |
| Digit-symbol test                 |                                     | $\beta$                 | 95% CI      | P-value     | <i>Pslope</i> | $\beta$               | 95% CI      | P-Value     | <i>Pslope</i> |
| Latency time (s, log)             |                                     |                         |             |             |               |                       |             |             |               |
|                                   |                                     | BL                      | 0.38        | -2.47, 3.31 | 0.80          | 0.47                  | 1.04        | -1.82, 3.98 | 0.48          |
|                                   | FU                                  | 2.10                    | -1.47, 5.81 | 0.25        | 1.85          |                       | -2.03, 5.88 | 0.36        |               |
| Stroop Test                       |                                     | OR                      | 95% CI      | P-Value     | <i>Pslope</i> | OR                    | 95% CI      | P-Value     | <i>Pslope</i> |
| Error score in incongruent trials |                                     |                         |             |             |               |                       |             |             |               |
|                                   |                                     | BL                      | 1.53        | 0.41, 5.69  | 0.53          | 0.34                  | 1.35        | 0.32, 0.55  | 0.68          |
|                                   | FU                                  | 0.60                    | 0.15, 2.45  | 0.48        | 0.46          |                       | 0.10, 2.16  | 0.33        |               |
| Interference score                |                                     |                         |             |             |               |                       |             |             |               |
|                                   |                                     | BL                      | 0.65        | 0.18, 2.43  | 0.53          | 0.28                  | 0.74        | 0.18, 3.07  | 0.68          |
|                                   | FU                                  | 1.88                    | 0.46, 7.71  | 0.38        | 2.36          |                       | 0.50, 11.2  | 0.28        |               |
| Digit-symbol test                 |                                     | OR                      | 95% CI      | P-Value     | <i>Pslope</i> | OR                    | 95% CI      | P-Value     | <i>Pslope</i> |
| Error score                       |                                     |                         |             |             |               |                       |             |             |               |
|                                   |                                     | BL                      | 0.93        | 0.47, 1.81  | 0.82          | 0.33                  | 0.97        | 0.48, 1.98  | 0.94          |
|                                   | FU                                  | 1.56                    | 0.70, 3.48  | 0.28        | 2.00          |                       | 0.80, 5.00  | 0.14        |               |

<sup>a</sup> All models were derived by linear or logistic regression analysis for continuous and categorical outcomes, respectively. Adjusted models accounted for sex, age, ethnicity (white vs other), body mass index, educational attainment, current smoking, alcohol intake (light, moderate and heavy), and the total-to-HDL serum cholesterol ratio. Association sizes were expressed for a 10-fold difference in the blood lead concentration at baseline or follow-up.

**Table S11.** Time-dependent DST and ST results by observer (starts). Average values are geometric means [interquartile range (IR)]. [MRT=mean reaction time; DST=digit-symbol test; ST=Stroop test].

| Characteristic <sup>a</sup>                      | Overall        |       |             | Baseline       |       |             | Year 1         |       |             | Year 2         |       |            |
|--------------------------------------------------|----------------|-------|-------------|----------------|-------|-------------|----------------|-------|-------------|----------------|-------|------------|
|                                                  | N <sup>b</sup> | Mean  | IR          | N <sup>b</sup> | Mean  | IR          | N <sup>b</sup> | Mean  | IR          | N <sup>b</sup> | Mean  | IR         |
| DST cohort (N=260)                               |                |       |             |                |       |             |                |       |             |                |       |            |
| Mean latency time (s, log) <sup>c</sup>          |                |       |             |                |       |             |                |       |             |                |       |            |
| Observer 1                                       | 6              | 99.1  | 84.4-111.8  | 6              | 99.1  | 84.4-111.8  | 0              | ...   | ...         | 0              | ...   | ...        |
| Observer 2                                       | 57             | 101.1 | 89.9-114.4  | 53             | 101.8 | 91.6-114.4  | 2              | 106.3 | 89.2-126.8  | 2              | 79.6  | 64.2-98.6  |
| Observer 3                                       | 72             | 104.1 | 93.6-117.4  | 69             | 104.6 | 94.4-117.3  | 3              | 93.3  | 77.8-118.0  | 0              | ...   | ...        |
| Observer 4                                       | 99             | 108.0 | 91.8-122.3  | 0              | ...   | ...         | 39             | 115.5 | 102.1-130.0 | 60             | 103.4 | 88.1-115.8 |
| Observer 5                                       | 118            | 111.5 | 93.0-131.9  | 0              | ...   | ...         | 40             | 119.3 | 107.0-133.6 | 78             | 107.6 | 90.0-125.9 |
| Observer 6                                       | 40             | 112.0 | 97.6-124.8  | 28             | 109.5 | 95.1-121.6  | 12             | 118.0 | 108.3-131.8 | 0              | ...   | ...        |
| Observer 7                                       | 75             | 112.1 | 100.8-122.7 | 41             | 107.7 | 95.6-119.9  | 34             | 117.6 | 108.6-123.4 | 0              | ...   | ...        |
| Observer 8                                       | 7              | 112.6 | 87.7-131.3  | 3              | 120.6 | 85.3-156.5  | 4              | 107.0 | 93.9-121.9  | 0              | ...   | ...        |
| Observer 9                                       | 148            | 115.7 | 102.7-130.2 | 37             | 120.6 | 107.4-131.2 | 70             | 117.7 | 105.7-131.5 | 41             | 108.3 | 91.3-120.3 |
| Observer 10                                      | 85             | 116.9 | 101.8-133.5 | 23             | 124.5 | 104.8-149.8 | 40             | 119.3 | 107.0-133.6 | 22             | 105.4 | 91.3-125.8 |
| ST cohort (N=168)                                |                |       |             |                |       |             |                |       |             |                |       |            |
| MRT in incongruent trials (ms, log) <sup>c</sup> |                |       |             |                |       |             |                |       |             |                |       |            |
| Observer 1                                       | 5              | 1344  | 1294-1499   | 5              | 1344  | 1294-1499   | 0              | ...   | ...         | 0              | ...   | ...        |
| Observer 2                                       | 5              | 1426  | 1146-1440   | 1              | 1225  | ...         | 4              | 1481  | 1129-1942   | 0              | ...   | ...        |
| Observer 3                                       | 52             | 1471  | 1216-1734   | 49             | 1468  | 1235-1725   | 3              | 1515  | 1089-2450   | 0              | ...   | ...        |
| Observer 4                                       | 39             | 1659  | 1288-1998   | 37             | 1678  | 1307-1998   | 2              | 1346  | 1051-1724   | 0              | ...   | ...        |
| Observer 5                                       | 31             | 1693  | 1321-2081   | 21             | 1466  | 1210-1842   | 10             | 2291  | 2014-2533   | 0              | ...   | ...        |
| Observer 6                                       | 78             | 1714  | 1410-2014   | 40             | 1695  | 1371-1946   | 38             | 1734  | 1425-2150   | 0              | ...   | ...        |
| Observer 7                                       | 32             | 1926  | 1608-2250   | 0              | ...   | ...         | 28             | 1855  | 1516-2116   | 4              | 2504  | 2069-3030  |
| Observer 8                                       | 87             | 2100  | 1667-2535   | 15             | 2049  | 1513-2678   | 63             | 2104  | 1672-2516   | 9              | 2155  | 1736-2630  |
| Observer 9                                       | 17             | 2154  | 1919-2478   | 0              | ...   | ...         | 8              | 2012  | 1605-2420   | 9              | 2288  | 1919-2758  |
| Observer 10                                      | 32             | 2521  | 1942-3311   | 0              | ...   | ...         | 12             | 2317  | 1891-3176   | 20             | 2652  | 2038-3314  |

**Table S11.** Time-dependent DST and ST results by observer (continued from page 18). Average values are geometric means [interquartile range (IR)]. [MRT=mean reaction time; DST=digit-symbol test; ST=Stroop test].

| Characteristic <sup>a</sup>                    | Overall        |      |           | Baseline       |      |           | Year 1         |      |           | Year 2         |      |           |
|------------------------------------------------|----------------|------|-----------|----------------|------|-----------|----------------|------|-----------|----------------|------|-----------|
|                                                | N <sup>b</sup> | Mean | IR        | N <sup>b</sup> | Mean | IR        | N <sup>b</sup> | Mean | IR        | N <sup>b</sup> | Mean | IR        |
| MRT in congruent trials (ms, log) <sup>c</sup> |                |      |           |                |      |           |                |      |           |                |      |           |
| Observer 1                                     | 5              | 1238 | 1125-1428 | 5              | 1238 | 1125-1428 | 0              | ...  | ...       | 0              | ...  | ...       |
| Observer 2                                     | 5              | 1262 | 1103-1255 | 1              | 1255 | ...       | 4              | 1264 | 1084-1473 | 0              | ...  | ...       |
| Observer 3                                     | 52             | 1343 | 1110-1567 | 49             | 1342 | 1119-1585 | 3              | 1362 | 1046-2084 | 0              | ...  | ...       |
| Observer 4                                     | 31             | 1477 | 1173-1999 | 21             | 1280 | 1106-1467 | 10             | 1997 | 1894-2239 | 0              | ...  | ...       |
| Observer 5                                     | 78             | 1610 | 1298-1859 | 40             | 1542 | 1276-1830 | 38             | 1685 | 1390—2078 | 0              | ...  | ...       |
| Observer 6                                     | 39             | 1620 | 1246-1920 | 37             | 1644 | 1273-1920 | 2              | 1232 | 1062-1430 | 0              | ...  | ...       |
| Observer 7                                     | 32             | 1824 | 1461-2198 | 0              | ...  | ...       | 28             | 1814 | 1461-2198 | 4              | 1898 | 1639-2198 |
| Observer 8                                     | 87             | 1961 | 1570-2375 | 15             | 1925 | 1335-2327 | 63             | 1961 | 1598-2375 | 9              | 2026 | 1682-2844 |
| Observer 9                                     | 17             | 2173 | 1556-2827 | 0              | ...  | ...       | 8              | 1907 | 1429-2384 | 9              | 2440 | 2057-2853 |
| Observer 10                                    | 32             | 2399 | 1680-3134 | 0              | ...  | ...       | 12             | 2138 | 1646-2639 | 20             | 2571 | 1939-3189 |

<sup>a</sup> Observers were sorted according to the participants' performance in all neurocognitive test they took from the workers. Braces join study nurses with similar mean latency time or MRT among the workers undergoing testing.

<sup>b</sup> N indicates the number of tests.

<sup>c</sup> Significance of the difference between observers derived by ANOVA:  $P < 0.0001$ .

**Table S12.** Geometric mean blood lead levels in the DST and ST cohorts by observer. [interquartile range (IR)]. [DST=digit-symbol test; ST=Stroop test].

| Characteristic <sup>a</sup>                                       | Overall        |      |           | Baseline       |      |          | Year 1         |      |           | Year 2         |      |           |
|-------------------------------------------------------------------|----------------|------|-----------|----------------|------|----------|----------------|------|-----------|----------------|------|-----------|
|                                                                   | N <sup>b</sup> | Mean | IR        | N <sup>b</sup> | Mean | IR       | N <sup>b</sup> | Mean | IR        | N <sup>b</sup> | Mean | IR        |
| Blood lead in DST cohort ( $\mu\text{g/dL}$ , N=260) <sup>c</sup> |                |      |           |                |      |          |                |      |           |                |      |           |
| Observer 1                                                        | 6              | 1.4  | 0.6-2.2   | 6              | 1.4  | 0.6-2.2  | 0              | ...  | ...       | 0              | ...  | ...       |
| Observer 2                                                        | 72             | 4.2  | 2.6-7.2   | 69             | 3.9  | 2.6-6.5  | 3              | 13.6 | 7.1-24.5  | 0              | ...  | ...       |
| Observer 3                                                        | 57             | 4.3  | 2.8-7.7   | 53             | 4.0  | 2.5-7.3  | 2              | 14.5 | 12.1-17.4 | 2              | 10.9 | 5.0-23.7  |
| Observer 4                                                        | 75             | 7.7  | 4.2-18.0  | 41             | 4.0  | 1.8-8.3  | 34             | 17.2 | 12.3-22.2 | 0              | ...  | ...       |
| Observer 5                                                        | 40             | 8.1  | 3.0-17.9  | 28             | 5.9  | 2.5-11.9 | 12             | 17.1 | 14.6-22.8 | 0              | ...  | ...       |
| Observer 6                                                        | 7              | 8.2  | 4.0-15.9  | 3              | 4.6  | 3.0-8.3  | 4              | 12.7 | 7.7-21.0  | 0              | ...  | ...       |
| Observer 7                                                        | 85             | 9.0  | 4.9-18.7  | 23             | 3.4  | 1.6-9.0  | 40             | 12.6 | 8.6-22.2  | 22             | 13.3 | 10.3-17.6 |
| Observer 8                                                        | 148            | 9.6  | 5.2-18.6  | 37             | 3.8  | 2.0-7.2  | 70             | 13.1 | 8.6-20.6  | 41             | 13.0 | 11.7-19.4 |
| Observer 9                                                        | 118            | 12.1 | 8.5-22.1  | 0              | ...  | ...      | 40             | 13.2 | 10.6-22.6 | 78             | 11.6 | 7.4-21.8  |
| Observer 10                                                       | 99             | 13.0 | 8.8-21.1  | 0              | ...  | ...      | 39             | 11.3 | 7.8-19.5  | 60             | 14.2 | 11.1-21.9 |
| Blood lead in ST cohort ( $\mu\text{g/dL}$ , N=168) <sup>c</sup>  |                |      |           |                |      |          |                |      |           |                |      |           |
| Observer 1                                                        | 5              | 1.5  | 0.6-2.2   | 5              | 1.5  | 0.6-2.2  | 0              | ...  | ...       | 0              | ...  | ...       |
| Observer 2                                                        | 52             | 3.9  | 2.6-6.4   | 49             | 3.6  | 2.6-5.7  | 3              | 13.6 | 7.1-24.5  | 0              | ...  | ...       |
| Observer 3                                                        | 39             | 4.4  | 2.8-8.3   | 37             | 4.1  | 2.8-7.3  | 2              | 14.5 | 12.1-17.4 | 0              | ...  | ...       |
| Observer 4                                                        | 31             | 8.4  | 3.7-15.9  | 21             | 6.0  | 2.9-11.8 | 10             | 16.7 | 14.7-23.1 | 0              | ...  | ...       |
| Observer 5                                                        | 78             | 8.4  | 4.3-19.1  | 40             | 4.2  | 1.8-8.7  | 38             | 17.7 | 12.9-23.9 | 0              | ...  | ...       |
| Observer 6                                                        | 87             | 11.1 | 6.8-19.2  | 15             | 5.0  | 3.2-10.0 | 63             | 13.4 | 8.3-20.6  | 9              | 11.7 | 11.0-14.8 |
| Observer 7                                                        | 5              | 11.7 | 8.3-15.9  | 1              | 8.3  | ...      | 4              | 12.7 | 7.7-21.0  | 0              | ...  | ...       |
| Observer 8                                                        | 32             | 12.2 | 9.4-19.9  | 0              | ...  | ...      | 28             | 12.2 | 9.4-19.9  | 4              | 11.9 | 7.7-18.3  |
| Observer 9                                                        | 17             | 16.6 | 14.1-20.4 | 0              | ...  | ...      | 8              | 14.1 | 12.4-16.5 | 9              | 19.1 | 15.9-24.6 |
| Observer 10                                                       | 32             | 17.3 | 14.8-24.5 | 0              | ...  | ...      | 12             | 15.6 | 15.1-23.8 | 20             | 18.3 | 14.8-25.3 |

<sup>a</sup> Observers were sorted according to the participants' baseline blood lead concentration. Braces join study nurses with similar blood lead levels in tested workers.

<sup>b</sup> N indicates the number of tests.

<sup>c</sup> Significance of the difference between observers derived by ANOVA: P<0.0001.

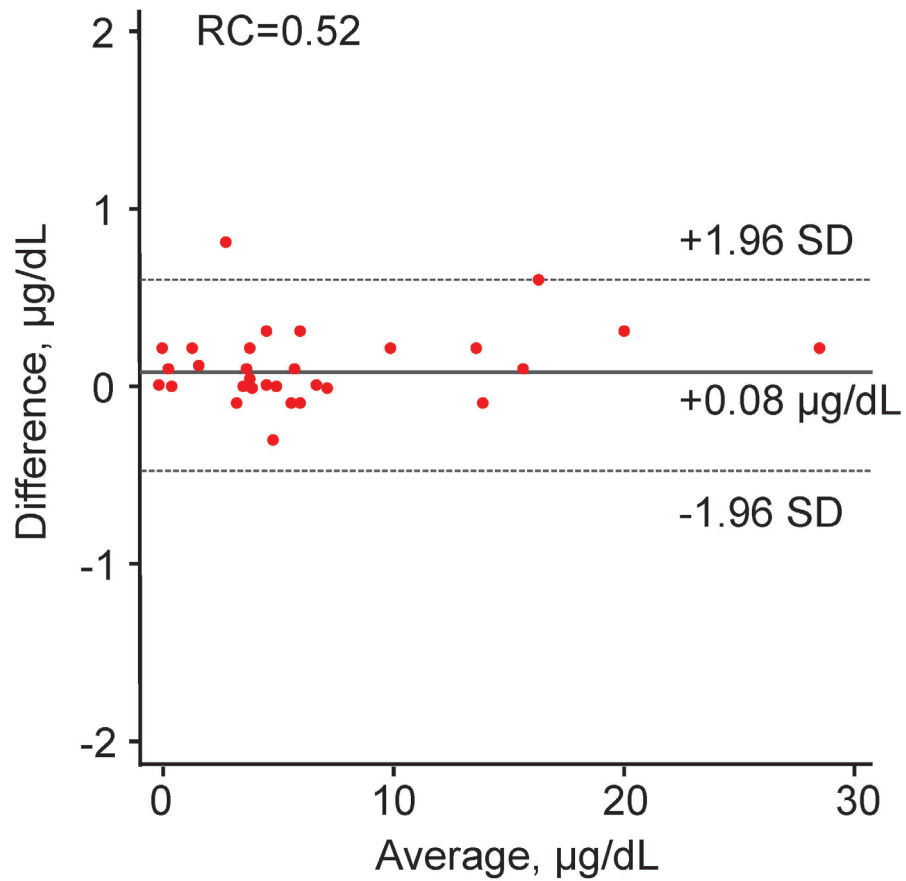

**Figure S1**

Bland–Altman plot for duplicate blood lead measurements in 30 workers. The difference between both measurements was plotted against the average of both measurements. The bias (repeat minus first measurement) was +0.08 µg/dL ( $P=0.078$ ). The reproducibility coefficient (RC) is twice the SD of the signed differences between duplicate measurements. Reproduced from reference 17.

**[A] DST cohort (N=260)**

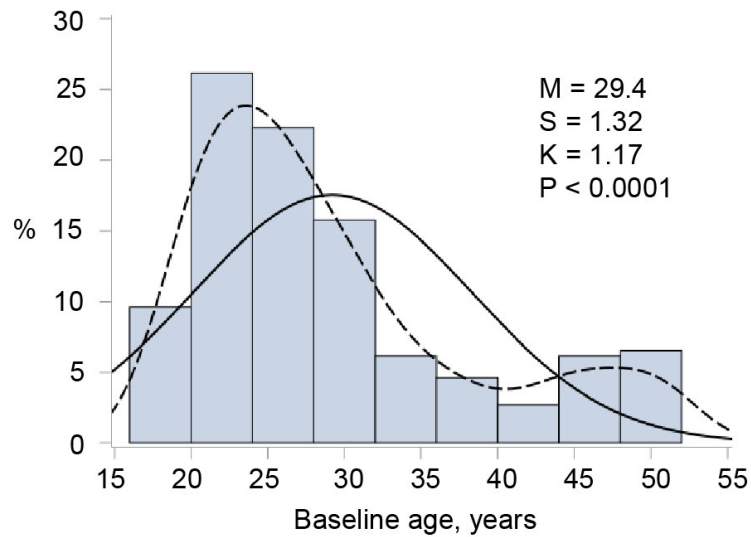

**[B] ST cohort (N=168)**

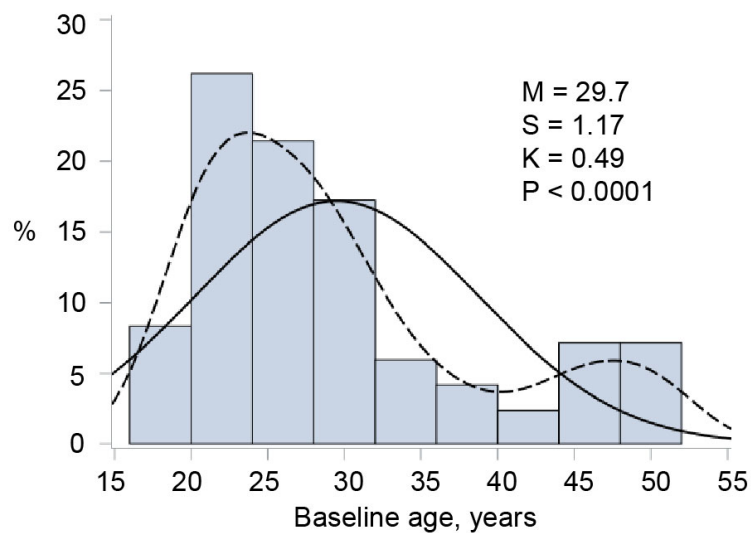

**Figure S2**

Baseline age distribution in the DST [A] and ST [B] cohorts. [M, mean; S, skewness; K, kurtosis; DST=digit-symbol test; ST=Stroop test]. The solid and dotted lines represent the normal and kernel density distributions. The P values are for departure of the actually observed distribution from normality according to the Shapiro-Wilk statistic.

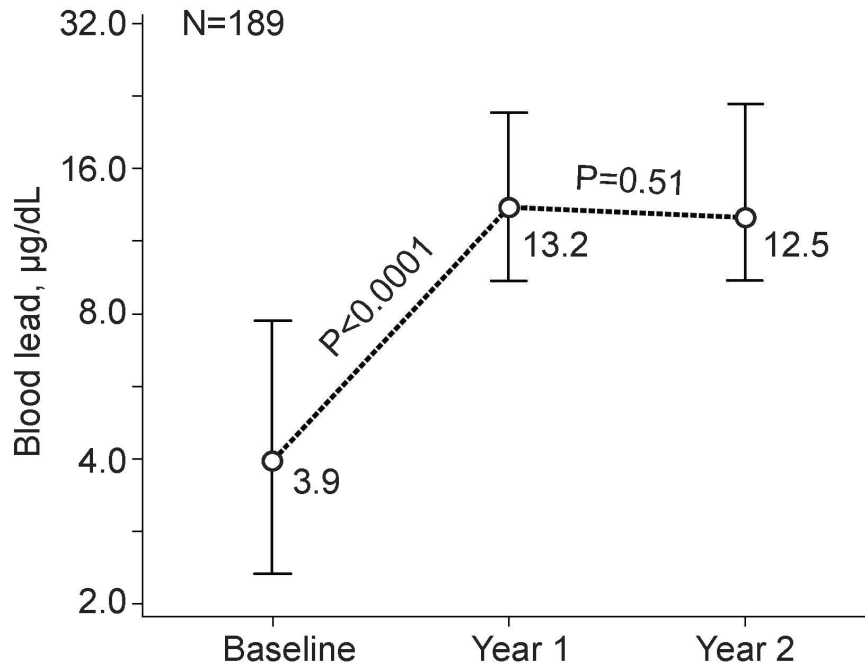

**Figure S3**

Blood lead levels at baseline and at the 1-year and 2-year follow-up visits in 189 workers with 2 follow-up visits. Plotted values are geometric means. Vertical bars indicate the interquartile range.

**[A] DST cohort (N=260)**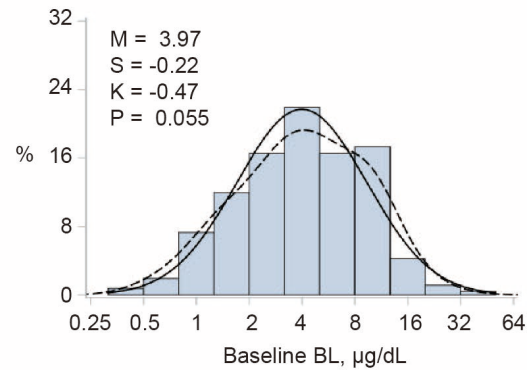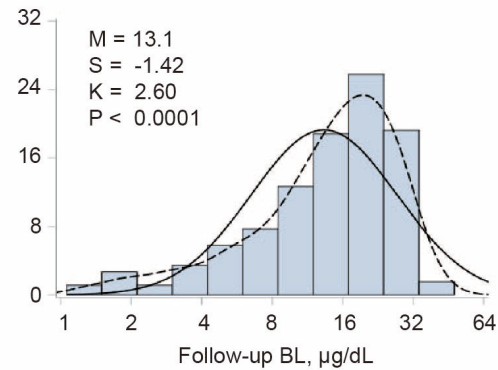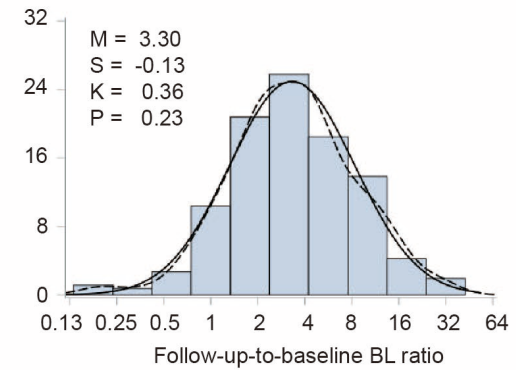**[B] ST cohort (N=168)**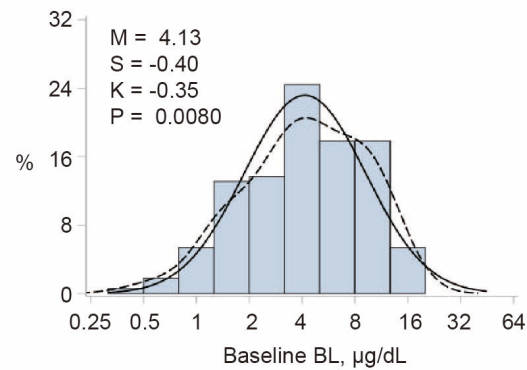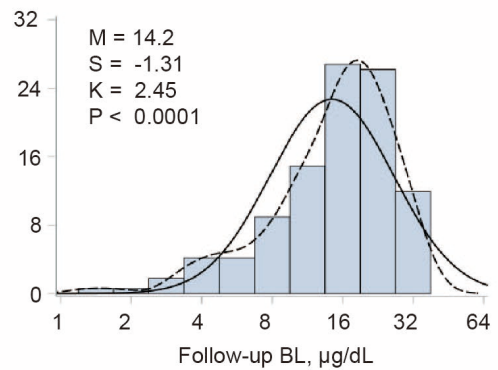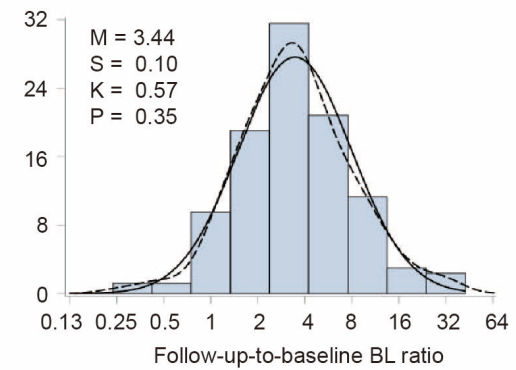**Figure S4**

Distributions of baseline blood lead, follow-up blood lead, and the baseline-to-last-follow-up ratios in blood lead in the DST and ST cohorts. [M, mean; S, skewness; K, kurtosis; DST=digit-symbol test; ST=Stroop test; BL=blood lead]. The solid and dotted lines represent the normal and kernel density distributions. The P values are for departure of the actually observed distribution from normality according to the Shapiro-Wilk statistic.



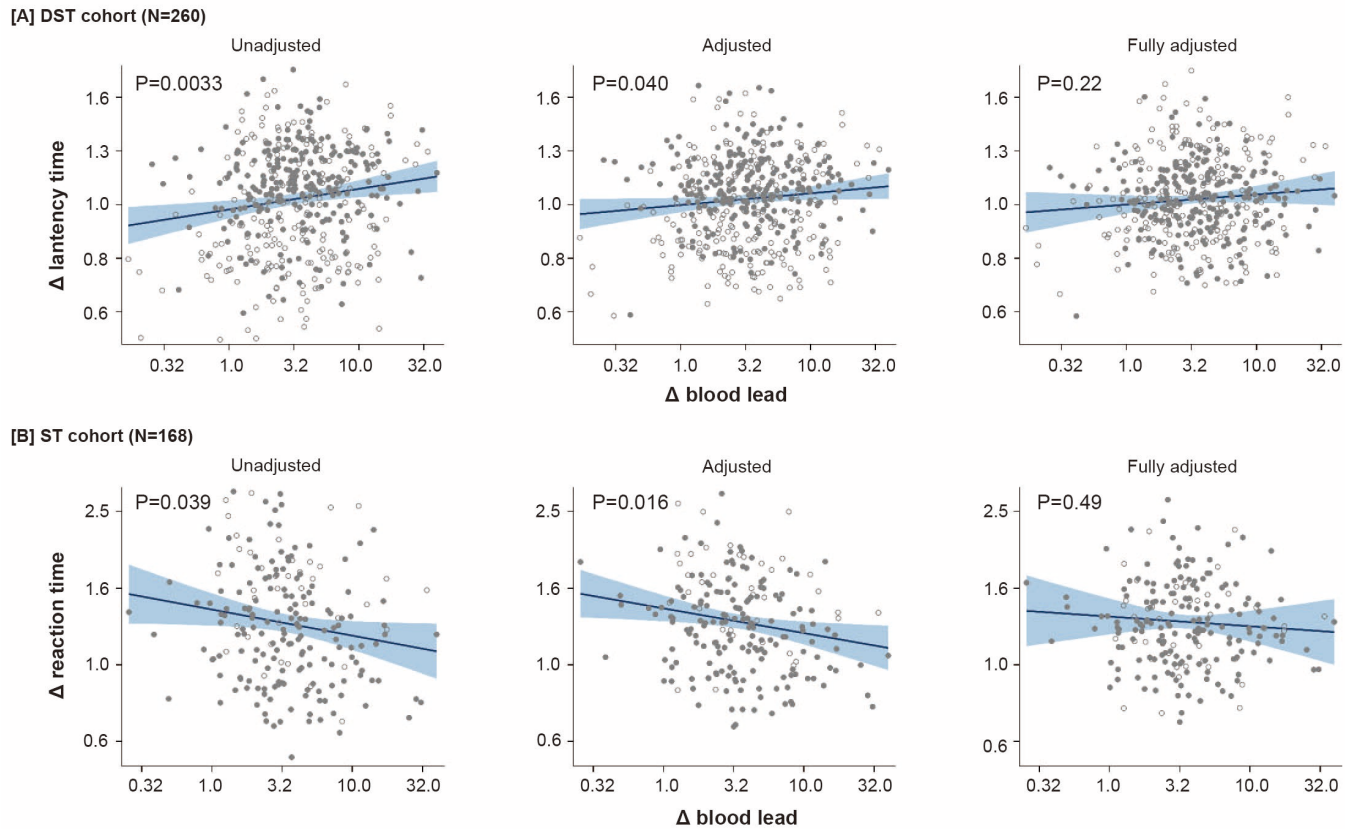**Figure S5**

Associations of the changes from baseline to last follow-up ( $\Delta$ ) in latency time in DST cohort and in mean reaction time in ST cohort with the follow-up-to-baseline blood lead concentration ratio ( $\Delta$ ). [DST=digit-symbol test; ST=Stroop test]. Closed and open symbols depict the first and second follow-up results, respectively. The regression line with 95% confidence interval were derived from mixed models accounting for clustering of the observations within participants. Adjusted models accounted for sex, baseline age and the baseline value of latency time or mean reaction time. Fully adjusted models additionally accounted for ethnicity (white vs other), change in age, baseline body mass index, changes in body weight, educational attainment, baseline blood lead, and the baseline values of and changes during follow-up in smoking status, and the total-to-HDL serum cholesterol ratio and alcohol consumption (light, moderate and heavy drinkers).
